# Supplementary material for: In situ self-assembled Ag–Fe3O4 nanoclusters in exosomes for cancer diagnosis
Source: Royal Society of Chemistry journal article supplement (doi:10.1039/c9tb02610j), 2020-01-01
Supplement: c9tb02610j1.pdf [file c9tb02610j1.pdf]

### Electronic Supplementary Information (ESI)

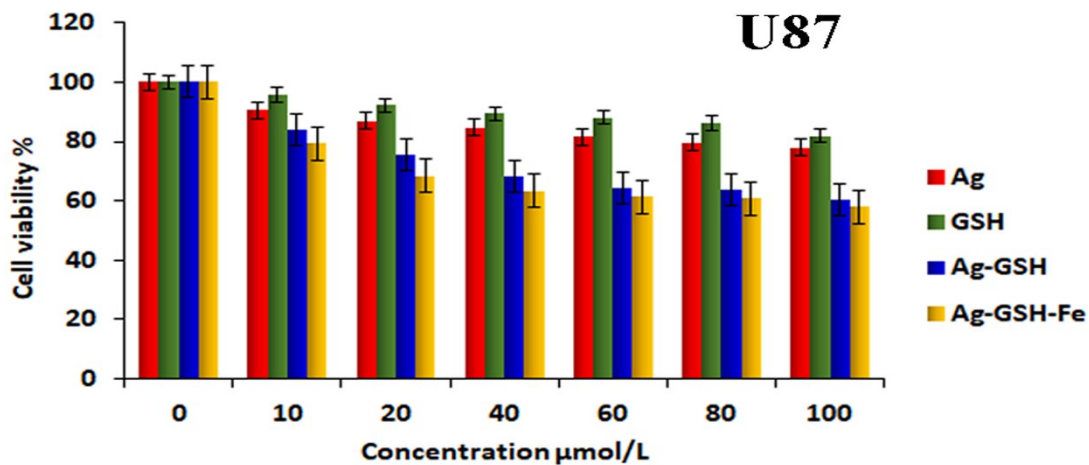

**Fig. S 1** MTT assay for in vitro cytotoxicity U87 cancer cells, after 24 hours of incubation survival rates of different concentrations of complex Ag, GSH, [Ag(GSH)]<sup>+</sup> and [FeCl<sub>2</sub>-Ag(GSH)]<sup>+</sup> (0 = Control).

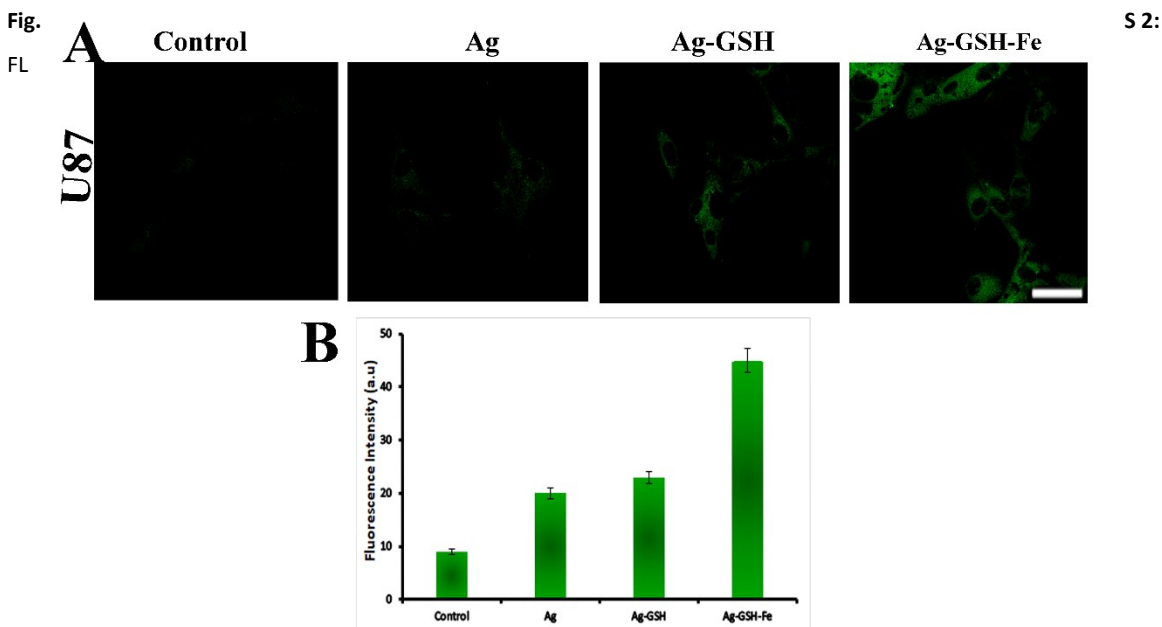

imaging of U87 cancer cells. (A) is the confocal micrograph of U87 treated cells for 24 h, control with PBS, 20  $\mu\text{mol/L}$   $\text{AgNO}_3$ , 20 $\mu\text{mol/L}$  GSH, and 15mmol/L  $\text{FeCl}_2$  with a 579 nm fluorescence excitation wavelength, whereas, (B) is relevant FL intensity.

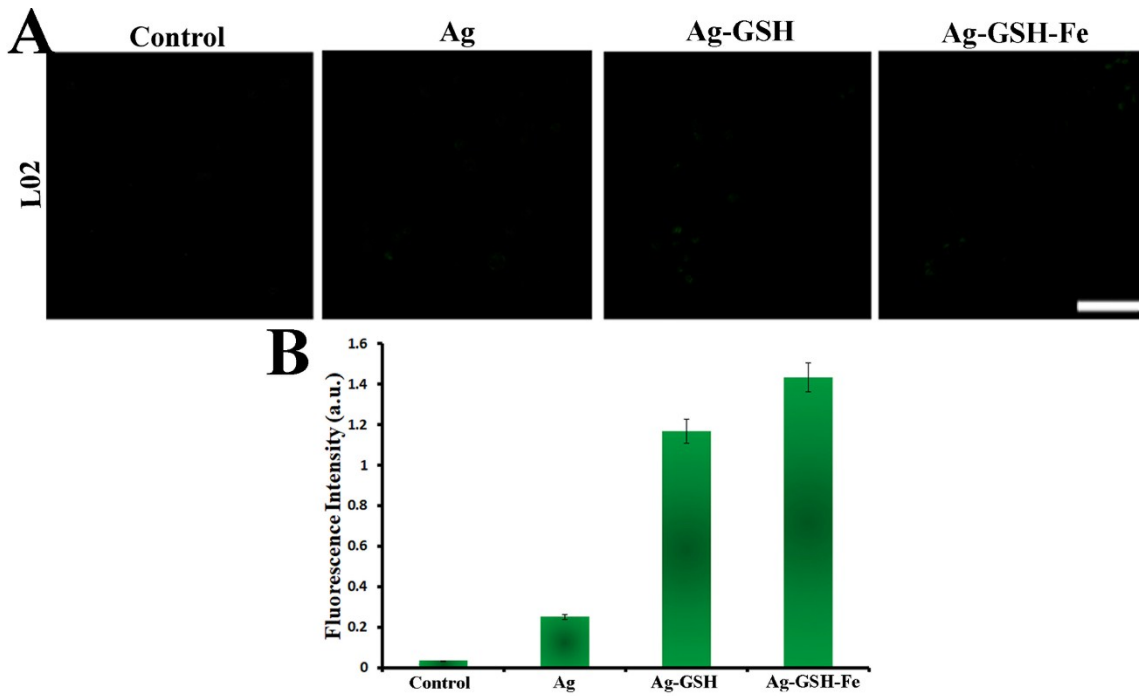

**Fig. S 3** FL imaging of L02 (human embryonic liver cells). (A) treated for 24 h, control with PBS, 20  $\mu\text{mol/L}$   $\text{AgNO}_3$ , 20 $\mu\text{mol/L}$  GSH, and 15mmol/L  $\text{FeCl}_2$  with a 579 nm fluorescence excitation wavelength, (Scale bar = 25  $\mu\text{m}$ ). (B) FL intensity of cells after treatment with Ag-GSH and Fe ions solution separately or in a combination.

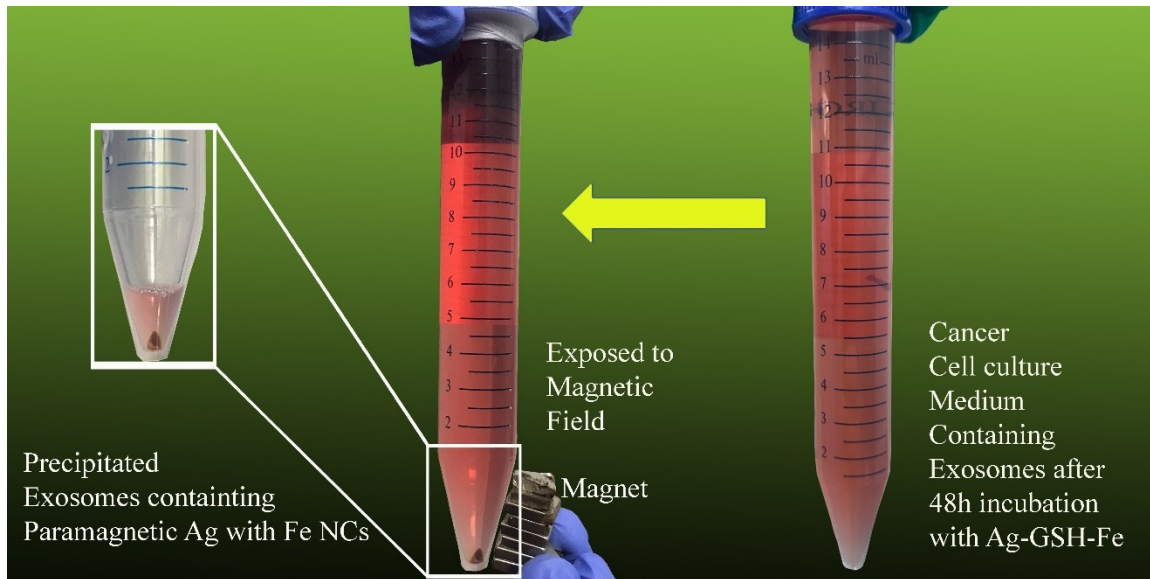

**Fig. S. Scheme 1** Representation of the paramagnetic behavior of biosynthesized nanoclusters of  $\text{Fe}_3\text{O}_4$  after treatment with Ag-GSH-Fe ions.

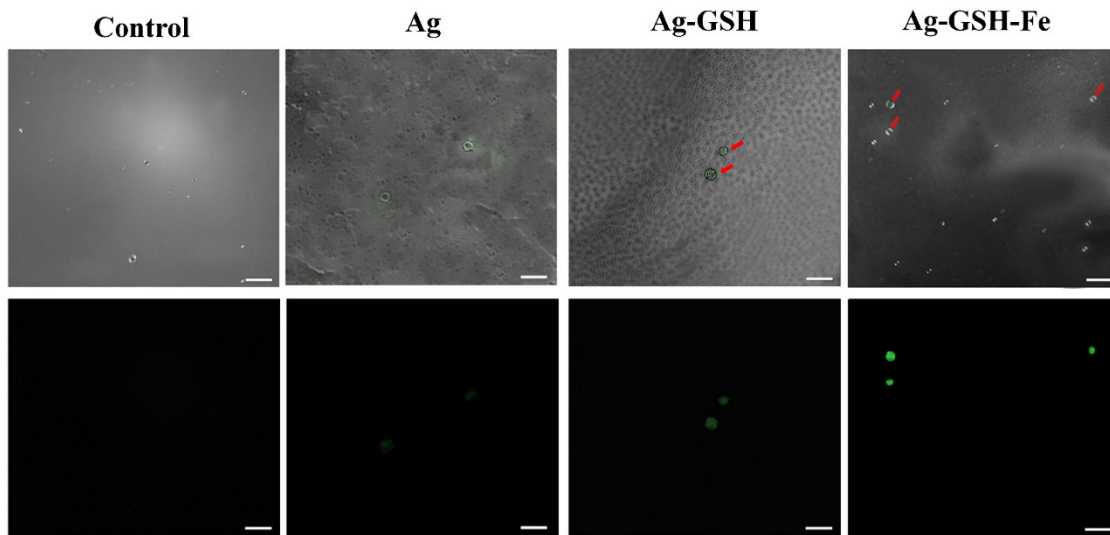

**Fig. S 4** Fluorescence imaging of exosomes under a confocal microscope, Confocal FL images of exosomes isolated from HepG2 cancer cells after treated with Ag-GSH and Fe ions solution for 48 h. (Oil emersion Lens, i.e., 100×).

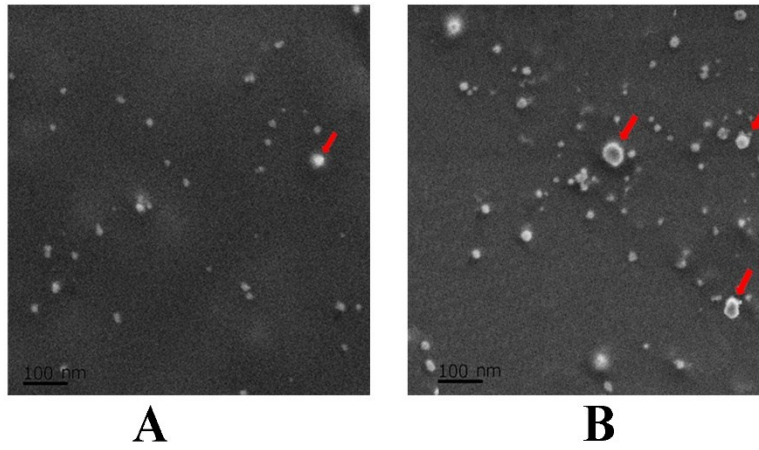

**Fig. S 5** Scanning electron microscopy (SEM) of isolated exosomes from HepG2 cancer cells (A) without any treatment. (B) loaded NCs Ag-GSH and Fe ions solution.

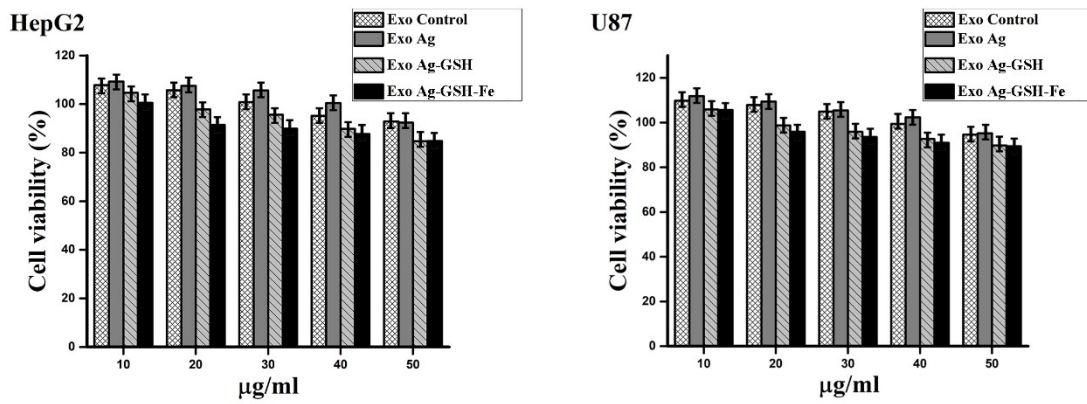

**Fig. S 6** Cellular uptake and cell viability of exosomes released from HepG2 cancer cells into HepG2 and U87 cancer cells, with different concentration for 24 h.
